# Supplementary material for: Phthalimide conjugation turns the AIE-active tetraphenylethylene unit non-emissive: its use in turn-on sensing of hydrazine in solution and the solid- and vapour-phase
Source: Royal Society of Chemistry journal article supplement (doi:10.1039/d1ra03563k), 2021-01-01

## Supporting Information

### **Phthalimide Conjugation Turns AIE-Active Tetraphenylethylene Unit Non-Emissive: Its use in Turn-on Sensing of Hydrazine in Solution, Solid- and Vapour-Phase**

Sharanabasava D. Hiremath,<sup>a†</sup> Ram U. Gawas<sup>a†</sup> Dharmendra Das,<sup>a</sup> Viraj G. Naik,<sup>a</sup> Akhil A. Bhosle,<sup>a</sup> Vishnu Priya Murali,<sup>b</sup> Kaustabh Kumar Maiti,<sup>b</sup> Raghunath Acharya,<sup>c,d</sup> Mainak Banerjee,<sup>\*a</sup> Amrita Chatterjee<sup>\*a</sup>

<sup>a</sup>Department of Chemistry, BITS, Pilani- K. K. Birla Goa Campus, NH 17B Bypass Road, Zuarinagar, Goa 403726, India.

<sup>b</sup>CSIR-National Institute for Interdisciplinary Science and Technology (CSIR-NIIST), Thiruvananthapuram, Kerala 695019, India.

<sup>c</sup>Radiochemistry Division, Bhabha Atomic Research Centre, Trombay, Mumbai 400085, INDIA.

<sup>d</sup>Department of Atomic Energy, Homi Bhabha National Institute, Mumbai 400094, INDIA.

Corresponding authors e-mail: [amrita@goa.bits-pilani.ac.in](mailto:amrita@goa.bits-pilani.ac.in) (AC); [mainak@goa.bits-pilani.ac.in](mailto:mainak@goa.bits-pilani.ac.in) (MB)

### Table of Contents

| Sr. No. | Contents                                                                                                 | Pg. No. |
|---------|----------------------------------------------------------------------------------------------------------|---------|
| 1       | Synthesis of <b>TPE-NH<sub>2</sub></b>                                                                   | S2      |
| 2       | Fluorimetric responses of <b>TPE-PMI</b> and <b>TPE-NH<sub>2</sub></b> in various solvents               | S2      |
| 3       | pH study of <b>TPE-PMI</b> with and without hydrazine                                                    | S3      |
| 4       | Selectivity study of <b>TPE-PMI</b> towards hydrazine                                                    | S3      |
| 5       | Quantum mechanical studies of <b>TPE-PMI</b> and <b>TPE-NH<sub>2</sub></b>                               | S4-S5   |
| 6       | LCMS analysis of the sensing solution                                                                    | S5      |
| 7       | Limit of detection                                                                                       | S6      |
| 8       | Detection of hydrazine in various real samples in solution phase                                         | S6      |
| 9       | Detection of hydrazine in sand samples                                                                   | S7      |
| 10      | Cytotoxicity and detection of hydrazine in HeLa cells                                                    | S7-S8   |
| 11      | Comparison of the present study and previous reports for the detection of hydrazine                      | S9-S11  |
| 12      | References                                                                                               | S11     |
| 13      | <sup>1</sup> H, <sup>13</sup> C NMR, HRMS and IR spectra of <b>TPE-PMI</b> and <b>TPE-NH<sub>2</sub></b> | S13-S15 |

## 1. Synthesis of 4-(1,2,2-triphenylvinyl)benzenamine (TPE-NH<sub>2</sub>)<sup>1</sup>

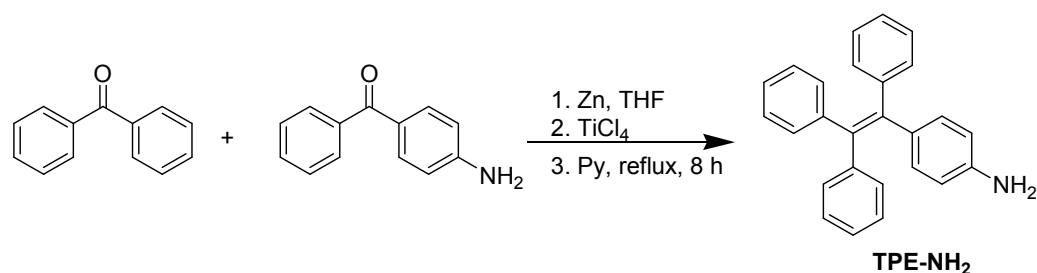

In a three-necked flask, zinc powder (0.8 g, 12 mmol) in 20 mL anhydrous THF was taken and the reaction vessel was kept under nitrogen atmosphere. The mixture was cooled to 0 °C and TiCl<sub>4</sub> (0.65 mL, 6 mmol) was slowly added by a syringe. The suspension was warmed to room temperature and stirred for 30 min, then heated at reflux for 2.5 h. The mixture was again cooled to 0 °C, charged with pyridine (0.25 mL, 3 mmol) and stirred for 10 min at the cold condition. An equimolar mixture of 4-aminobenzophenone (475 mg, 2.4 mmol) and benzophenone (440 mg, 2.4 mmol) in 20 mL of THF was added slowly. After complete addition, the reaction mixture was heated at reflux for 8 h. The reaction was quenched by addition of 10% aqueous K<sub>2</sub>CO<sub>3</sub> solution and extracted with CH<sub>2</sub>Cl<sub>2</sub>. The organic layer was collected and concentrated. The crude product was purified by column chromatography to give the desired product, **TPE-NH<sub>2</sub>** (320 mg, yield: 72%) as yellow solid. <sup>1</sup>H NMR (300 MHz, CDCl<sub>3</sub>): δ (ppm) 3.58 (2H, s, exchangeable), 6.46 (2H, d, *J* = 8.0 Hz), 6.89 (2H, d, *J* = 8.0 Hz), 7.03-7.26 (15H, m). <sup>13</sup>C NMR (75 MHz, CDCl<sub>3</sub>), δ (ppm) 114.4, 126.2, 126.3, 127.6, 127.8, 131.45, 131.49, 131.6, 132.6, 134.0, 139.4, 141.1, 144.27, 144.30, 144.5, 144.9; ESI-MS: *m/z* 348 [M + H]<sup>+</sup>.

## 2. Fluorimetric responses of TPE-PMI and TPE-NH<sub>2</sub> in various solvents

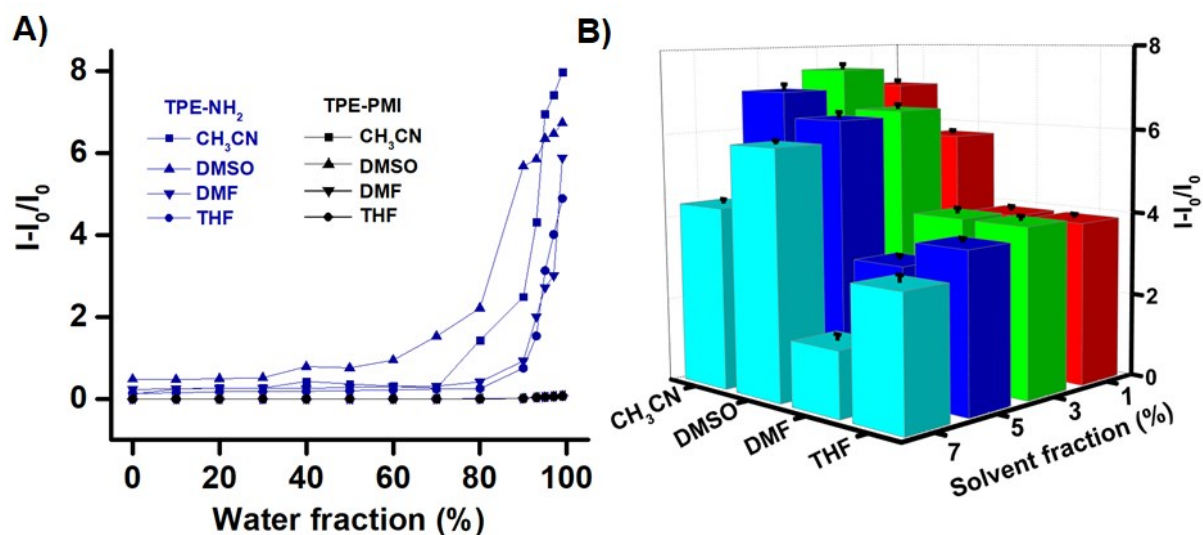

**Fig. S1.** A) Change in the fluorescence intensity of **TPE-NH<sub>2</sub>** and **TPE-PMI** at 492 nm as a function of different percentages of the water fraction in solvents like CH<sub>3</sub>CN, DMF, DMSO and THF; B) The fluorescence response of **TPE-PMI** towards hydrazine in different solvent fractions.

### 3. pH study of TPE-PMI with and without hydrazine

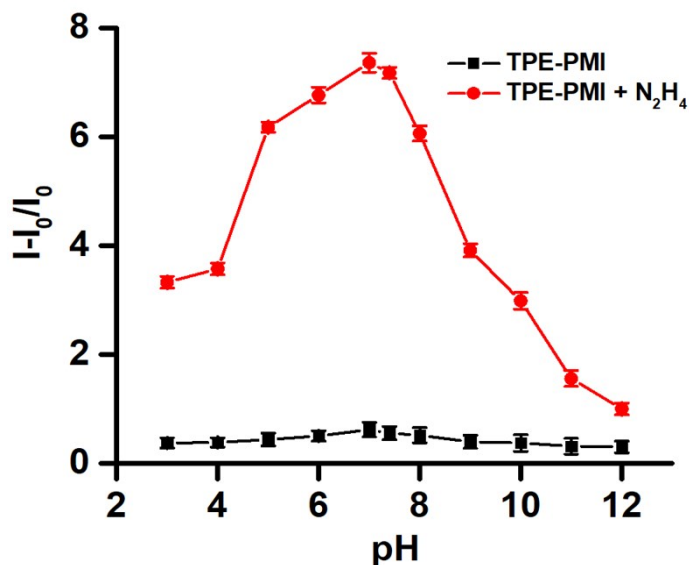

**Fig. S2** Fluorescence intensity change of TPE-PMI (10  $\mu$ M) in the absence and presence of hydrazine (10  $\mu$ M) in 3% CH<sub>3</sub>CN/ buffer solution [pH 2-6 acetate buffer, pH 7-8 HEPES buffer and pH 9-12 carbonate buffer] ( $\lambda_{\text{ex}} = 345$  nm,  $\lambda_{\text{em}} = 462$  nm).

### 4. Selectivity study of TPE-PMI towards hydrazine

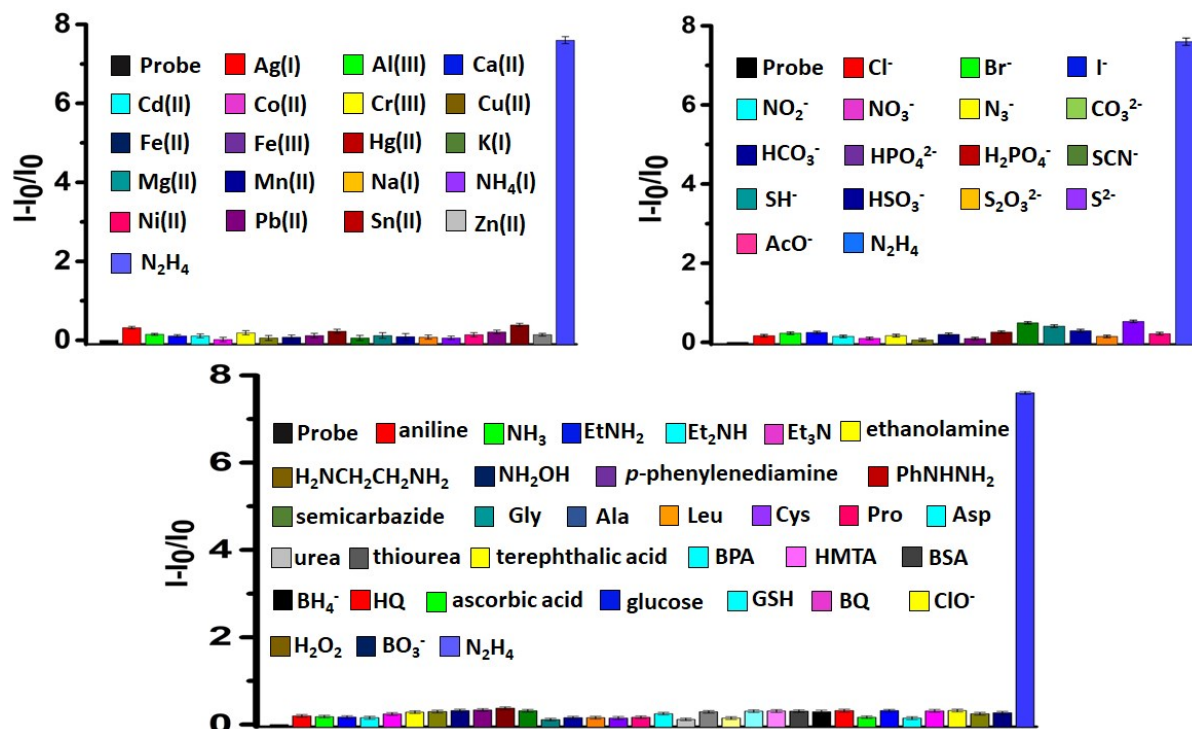

**Figure S3.** The fluorimetric responses of various metal ions (50  $\mu$ M), anions (50  $\mu$ M) and other molecules (50  $\mu$ M) towards TPE-PMI (10  $\mu$ M) under optimized conditions ( $\lambda_{\text{ex}}$  345 nm;  $\lambda_{\text{em}}$  462 nm).

## 5. Quantum mechanical studies of TPE-PMI and TPE-NH<sub>2</sub>

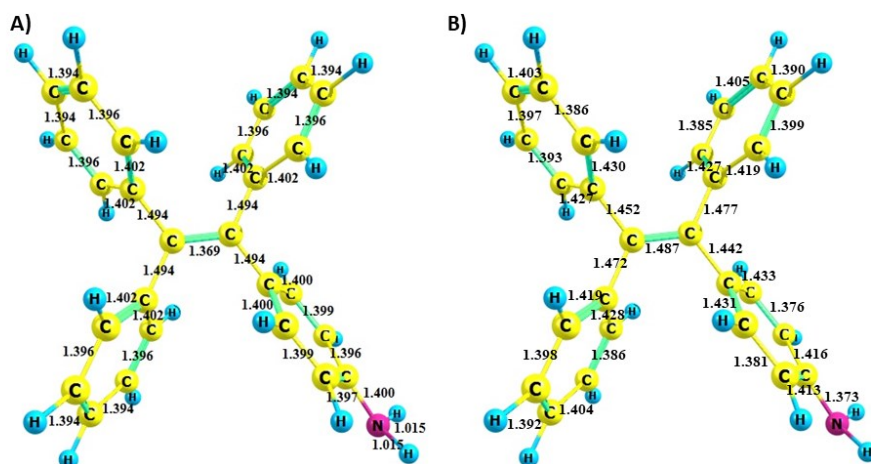

**Fig. S4** (A) Ground state geometry (optimized at the B3LYP/6-311G level) and (B) excited state geometry (optimized at the Td-B3LYP/6-311G level) of TPE-NH<sub>2</sub>.

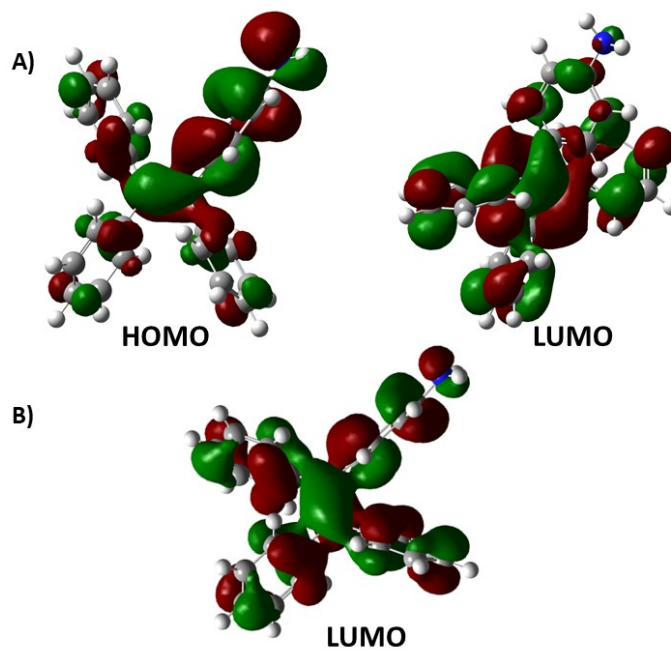

**Figure S5.** The frontier molecular orbitals of TPE-NH<sub>2</sub> at the optimized (A) ground state and (B) excited state geometries.

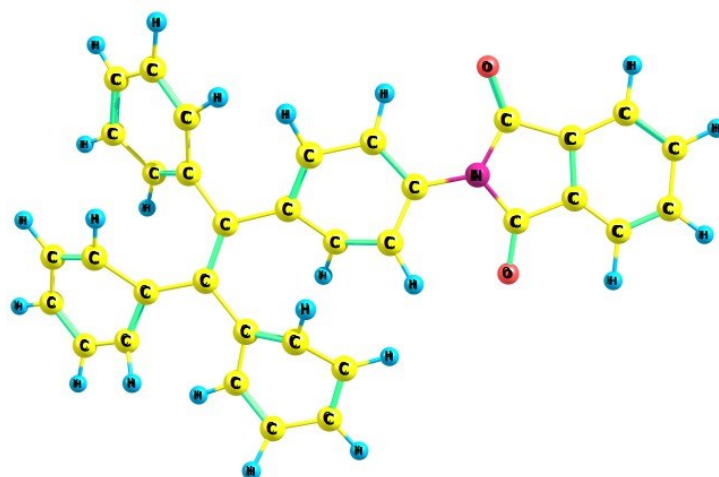

Figure S6. Ground state geometry (optimized at the B3LYP/6-311G level) of TPE-PMI.

## 6. LCMS analysis of the sensing solution

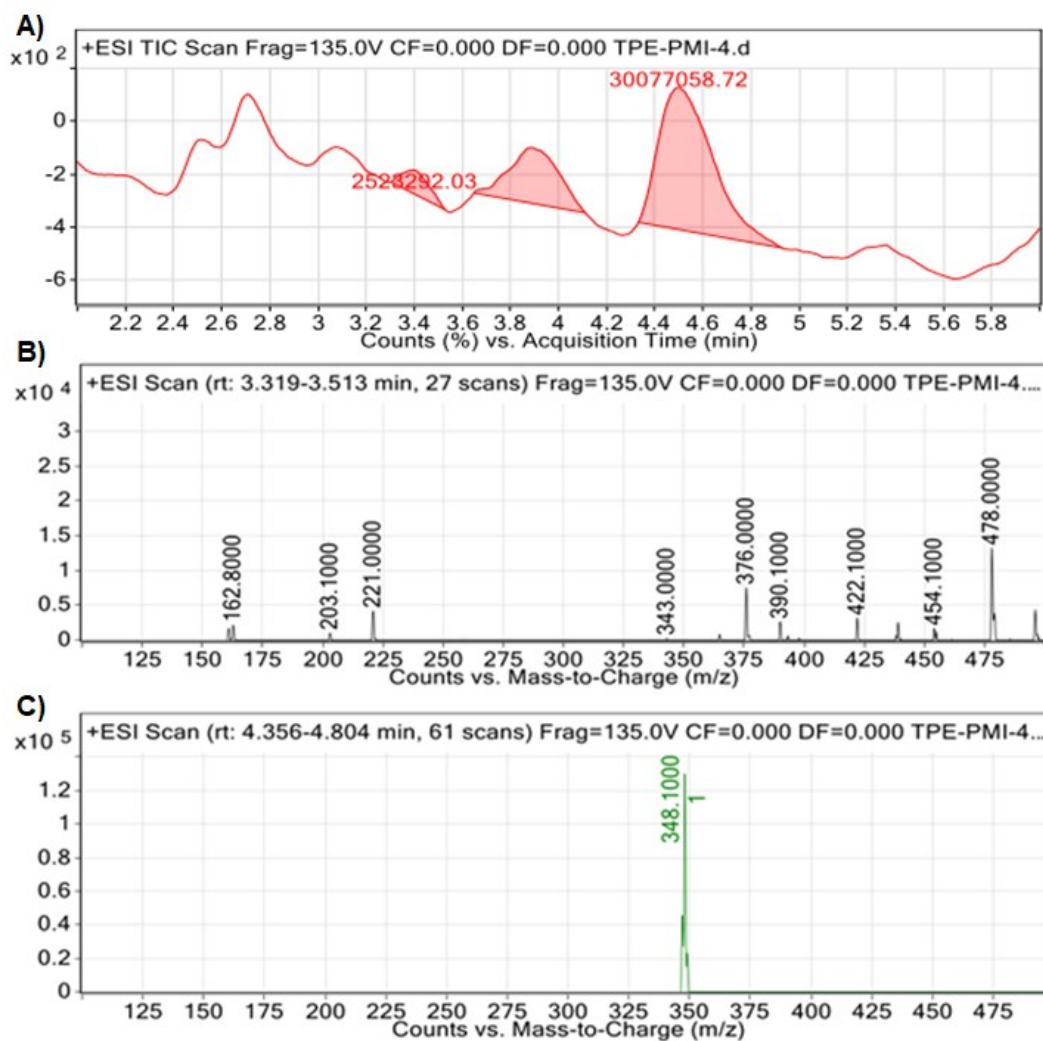

Fig. S7 (A) LCMS analysis of the sensing solution (B) showing the cleavage of TPE-PMI ( $m/z$  peak at 478  $[M + H]^+$ ); (C) upon addition of hydrazine to form a new  $m/z$  peak at 348 which corresponds to  $M + H$  of TPE-NH<sub>2</sub>.

## 7. Limit of detection (LOD)

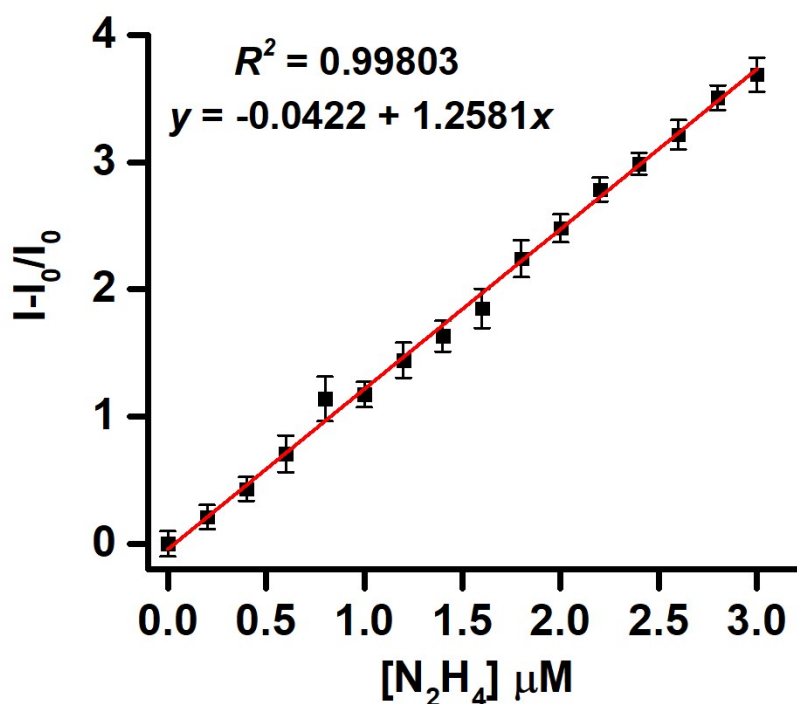

**Fig. S8** Plot of relative intensities vs concentration of hydrazine showing an excellent linear fit ( $R^2 = 0.99803$ ) which ensures that TPE-PMI can detect hydrazine as low as  $0.2 \mu M$  (or 6.4 ppb) ( $\lambda_{ex}$  345 nm,  $\lambda_{em}$  462 nm).

## 8. Detection of hydrazine in various real samples in solution phase

The concentration of hydrazine in five different water samples was closely matched with the amount of hydrazine spiked showing a recovery of 92-97%.

**Table S1.** Real sample analysis for hydrazine

| Sr. No. | Sample      | Concentration found from the graph ( $\mu M$ ) | Actual concentration ( $\mu M$ ) | Recovery (%) | RSD (%) (n = 3) |
|---------|-------------|------------------------------------------------|----------------------------------|--------------|-----------------|
| 1.      | Field water | 0.24                                           | 0.25                             | 96           | 4.1             |
| 2.      | Tap water   | 0.28                                           | 0.30                             | 93.3         | 3.3             |
| 3.      | Pond water  | 0.33                                           | 0.35                             | 94.2         | 3.6             |
| 4.      | Rain water  | 0.53                                           | 0.55                             | 96.3         | 3.9             |
| 5.      | River water | 0.74                                           | 0.8                              | 92.5         | 3.3             |

## 9. Detection of hydrazine in sand samples

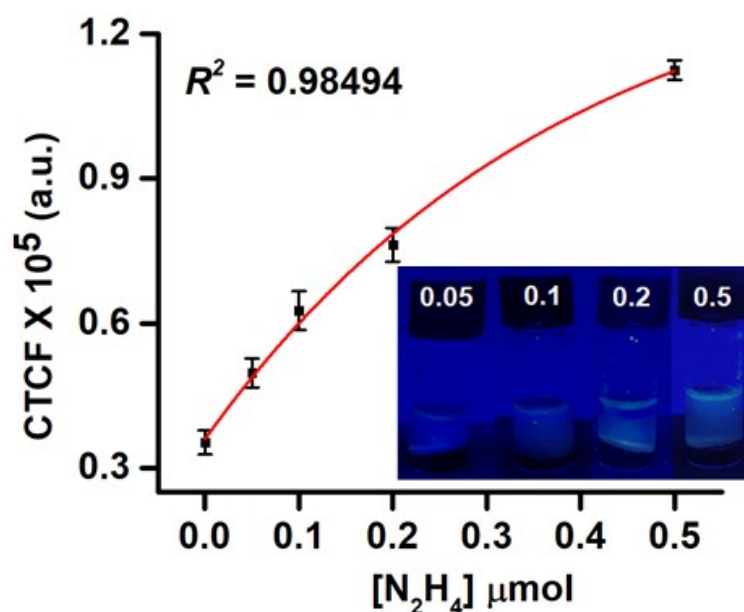

**Fig. S9.** The plots of the CTCF values of the images of the sensing assay at different concentrations of hydrazine spiked on the sand samples under long UV-light, captured on a smartphone and processed using ImageJ analysis software.

## 10. Cytotoxicity and detection of hydrazine in HeLa cells

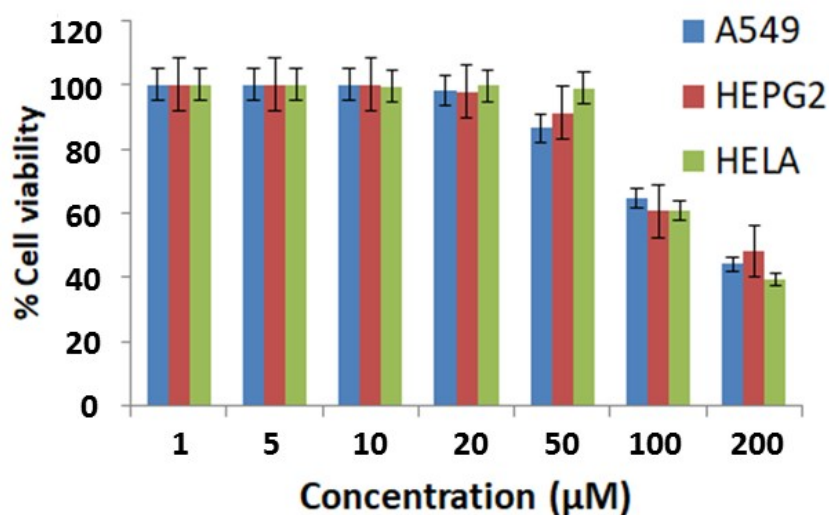

**Fig. S10** Cytotoxicity by MTT assay of **TPE-PMI** at different concentrations is presented above. The bar graphs showed that more than 60% of the total cells were still viable in the presence of up to 50 μM of **TPE-PMI** in the culture media of HeLa cells after 24 h. This implies that the **TPE-PMI** is nontoxic in nature.

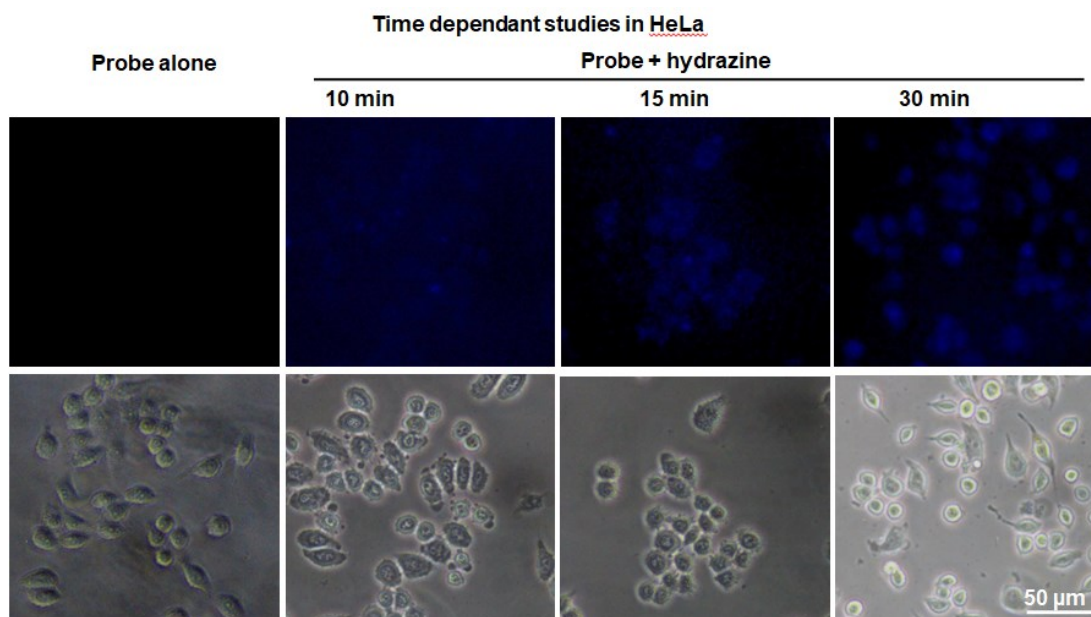

**Fig. S11** Time-dependent fluorescence detection of toxic hydrazine deposition in HeLa cells treated 50  $\mu\text{M}$  hydrazine in serum-free DMEM to utilized sensing fluorescence probe **TPE-PMI**. HeLa cells incubated for 10-30 mins and washed with PBS buffer. Next, the cells were treated with **TPE-PMI** (10  $\mu\text{M}$ ) for 60 min followed by PBS wash (3 times) and imaged under DAPI filter of Nikon fluorescent microscope.

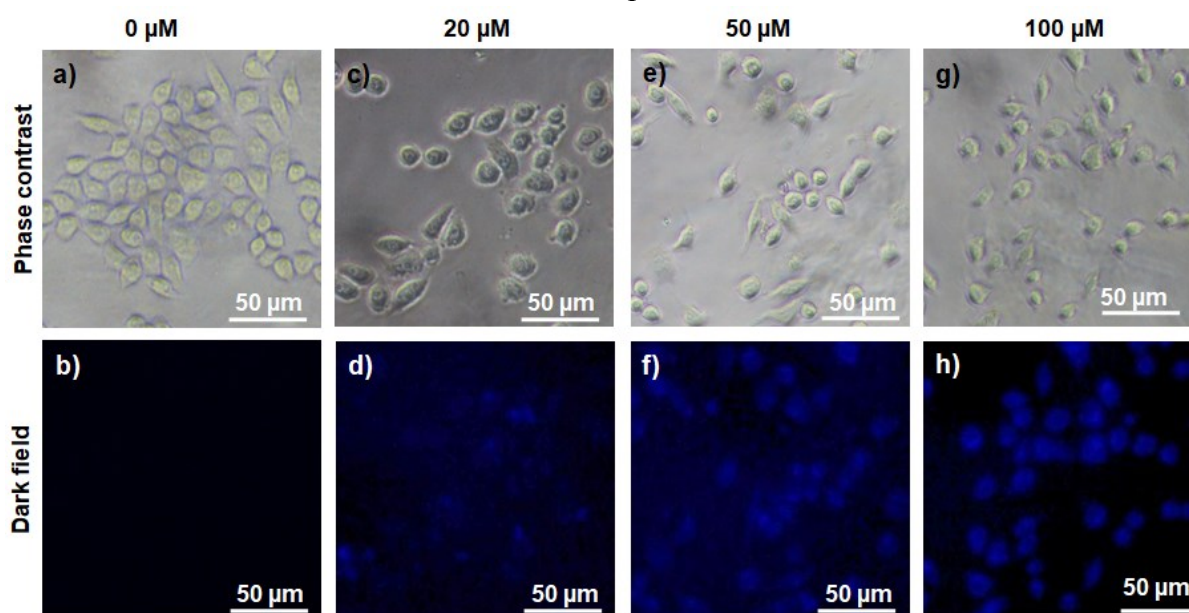

**Figure S12.** Pretreatment of HeLa cells with varying concentrations of hydrazine (a) and (b) **TPE-PMI** without hydrazine; (c) and (d) **TPE-PMI** and 20  $\mu\text{M}$  hydrazine; (e) and (f) **TPE-PMI** and 50  $\mu\text{M}$  hydrazine; (g) and (h) **TPE-PMI** and 100  $\mu\text{M}$  hydrazine.



**11. Table S2 Comparison of the present study and previous reports for detection of hydrazine**

| Probe Structure and reaction condition                                                                                                                | Solvent System                                                                  | LOD (ppb) | Linear Range ( $\mu\text{M}$ ) | Possible interfering | Fluorescence strategy | Ref (Main Manuscript) |
|-------------------------------------------------------------------------------------------------------------------------------------------------------|---------------------------------------------------------------------------------|-----------|--------------------------------|----------------------|-----------------------|-----------------------|
| 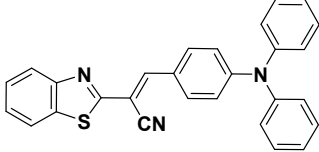 <p>3 steps synthesis<br/>(EtOH, DMF)</p>                             | DMSO-H <sub>2</sub> O<br>(10.0 $\mu\text{M}$ HEPES buffer, 3: 7 v/v, pH = 7.4,) | 6.6       | 0.75 – 1.5                     | None                 | ICT based Turn-on     | Samanta et al. [2]    |
|  <p>3 step synthesis<br/>(Nitromethane, DMSO)</p>                     | DMSO/PBS solution (1/1; v/v, pH 7.4)                                            | 19.2      | 0 – 130                        | ClO <sup>-</sup>     | ICT based Turn-on     | Wang et al. [3]       |
|  <p>2 step synthesis<br/>(ACN, piperidine)</p>                      | DMSO/PBS (v/v = 5:5, pH = 7.4)                                                  | 25.6      | 0 – 10                         | CN <sup>-</sup>      | ICT based Turn-off    | Mu et al. [4]         |
|  <p>3 steps synthesis<br/>(EtOH, CH<sub>2</sub>Cl<sub>2</sub>)</p> | CH <sub>3</sub> CN/PBS (10 mM, pH = 7.10, 3/7, v/v)                             | 2.90      | 0 – 50                         | None                 | AIE-ICT based Turn-on | Fan et al. [5]        |
|  <p>3 step synthesis<br/>(1,4-dioxane, EtOH)</p>                    | 1,4-dioxane/H <sub>2</sub> O (10 mM, v/v = 9/1, pH = 7.4)                       | 3.2       | 0 – 30                         | None                 | AIE-ICT based Turn-on | Lin et al. [6]        |

|                                                                                                                                                                   |                                                     |       |         |           |                                       |                   |
|-------------------------------------------------------------------------------------------------------------------------------------------------------------------|-----------------------------------------------------|-------|---------|-----------|---------------------------------------|-------------------|
| 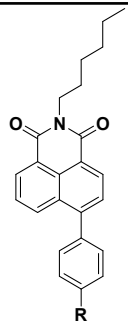 <p>R = H, -CHO</p> <p>2 step synthesis<br/>(EtOH, THF:H<sub>2</sub>O (3:1))</p> | PBS Buffer (pH 7.4)                                 | 0.081 | 0 – 0.5 | None      | AIEE-ICT based Turn-off               | Lyer et al. [7]   |
|  <p>1 step synthesis (CH<sub>2</sub>Cl<sub>2</sub>)</p>                           | HEPES (pH 7.4)                                      | 0.48  | 0 – 80  | None      | ICT based Turn-off                    | Yu et al. [8]     |
|  <p>2 steps synthesis<br/>Solution phase (EtOH)</p>                              | DMF:PBS Buffer (3:7, pH 7.4)                        | 5.2   | 0 – 600 | Bisulfite | Amination Based Turn-off              | Su et al. [9]     |
|  <p>3 steps synthesis<br/>(H<sub>2</sub>O<sub>2</sub>, TFA, EtOH)</p>          | CH <sub>3</sub> CN–H <sub>2</sub> O (1:9, v/v)      | 13.8  | 0 – 25  | None      | ESIPT based Turn-on                   | Maiti et al. [10] |
|  <p>3 steps synthesis<br/>(EtOH, CH<sub>2</sub>Cl<sub>2</sub>)</p>             | DMSO                                                | 2.6   | 2 – 12  | None      | ESIPT based Turn-on                   | Yin et al. [11]   |
|  <p>3 steps synthesis<br/>(THF-H<sub>2</sub>O, CH<sub>3</sub>COOH)</p>          | HEPES buffer (pH 7.2) using Triton X 100 surfactant | 1.5   | 0 – 30  | None      | Cleavage by gabriel pathway (Turn-on) | [12]              |

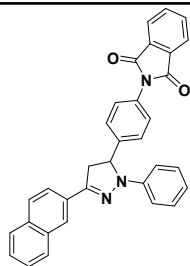

4 step synthesis  
(EtOH, ethyl acetate, acetic acid)

CH<sub>3</sub>CN:PBS  
Buffer (30:70, pH  
7.4)

2

10 – 20

None

Cleavage by  
Gabriel  
pathway  
(Turn-on)

Wan et al.  
[13]

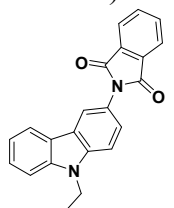

4 steps synthesis  
(DMF, AcOH, EtOH)

CH<sub>3</sub>CN:HEPES  
Buffer (1:1, pH  
7)

85.4

100 –  
400

None

Cleavage by  
Gabriel  
pathway  
(Turn-on)

Hu et al.  
[14]

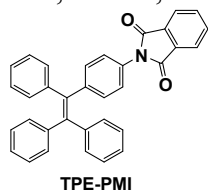

TPE-PMI

1 steps synthesis  
(mechanochemical, under neat  
condition)

CH<sub>3</sub>CN:HEPES  
(3:97 v/v)

6.4

0.2 – 3

None

Cleavage by  
Gabriel  
pathway  
(Turn-on)

**Present  
Work**

## 12. Reference

1. A. Chatterjee, D. G. Khandare, P. Saini, A. Chattopadhyaya, M. S. Majik and M. Banerjee, *RSC Adv.*, 2015, **5**, 31479.
2. S. K. Samanta, K. Maiti, S. S. Ali, U. N. Guria, A. Ghosh, P. Datta and A. K. Mahapatra, *Dyes Pigm.*, 2020, **173**, 07997.
3. L. Wang, Q. Pan, Y. Chen, Y. Ou, H. Li and B. Li, *Spectrochim. Acta Part A*, 2020, **241**, 118672.
4. S. Mu, H. Gao, C. Li, S. Li, Y. Wang, Y. Zhang, C. Ma, H. Zhang and X. Liu, *Talanta*, 2021, **221**, 121606.
5. H. Wu, Y. Wang, W.-N. Wu, Z.-Q. Xu, Z.-H. Xu, X.-L. Zhao and Y.-C. Fan, *Spectrochim. Acta Part A*, 2019, **222**, 117272.
6. X. Kong, M. Li, Y. Zhang, Y. Yin and W. Lin, *Sens. Actuators B*, 2021, **329**, 129232.
7. N. Meher, S. Panda, S. Kumar and P. K. Iyer, *Chem. Sci.*, 2018, **9**, 3978.

8. Y. Song, G. Chen, X. Han, J. You and F. Yu, *Sens. Actuators B*, 2019, **286**, 69.
9. J. Wu, J. Pan, J. Ze, L. Zeng and D. Su, *Sens. Actuators B*, 2018, **274**, 274.
10. S. Paul, R. Nandi, K. Ghoshal, M. Bhattacharyya and D. Maiti, *New J. Chem.*, 2019, **43**, 3303.
11. X. Shi, F. Huo, J. Chao, Y. Zhang and C. Yin, *New J. Chem.*, 2019, **43**, 10025.
12. F. H. A. Ali, N. Taye, D. G. Mogare, S. Chattopadhyay and A. Das, *Chem. Commun.*, 2016, **52**, 6166.
13. L. Wang, F.-Y. Liu, H.-Y. Liu, Y.-S. Dong, T.-Q. Liu, J.-F. Liu, Y.-W. Yao and X.-J. Wan, *Sens. Actuators B*, 2016, **229**, 441.
14. W.-D. Wang, Y. Hu, Q. Li and S.-L. Hu, *Inorg. Chim. Acta*, 2018, **477**, 206.



## HRMS of TPE-PMI

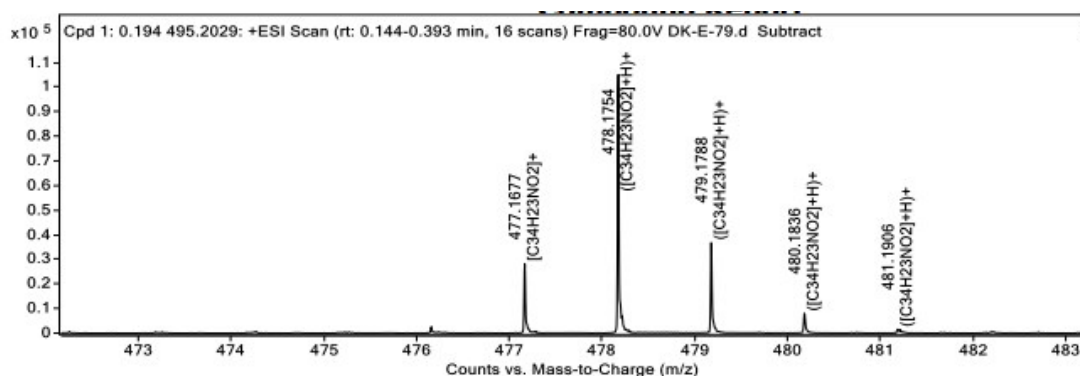

MS Spectrum Peak List

| m/z      | Calc m/z | Diff(ppm) | z | Abund     | Formula                                         | Ion                |
|----------|----------|-----------|---|-----------|-------------------------------------------------|--------------------|
| 477.1677 | 477.1723 | 9.62      | 1 | 28294.27  | C <sub>34</sub> H <sub>23</sub> NO <sub>2</sub> | M+                 |
| 478.1754 | 478.1802 | 9.85      | 1 | 106468.26 | C <sub>34</sub> H <sub>23</sub> NO <sub>2</sub> | (M+H) <sup>+</sup> |
| 479.1788 | 479.1835 | 9.71      | 1 | 36869.72  | C <sub>34</sub> H <sub>23</sub> NO <sub>2</sub> | (M+H) <sup>+</sup> |
| 480.1836 | 480.1867 | 6.28      | 1 | 7980.82   | C <sub>34</sub> H <sub>23</sub> NO <sub>2</sub> | (M+H) <sup>+</sup> |
| 481.1906 | 481.1897 | -1.91     | 1 | 1567.28   | C <sub>34</sub> H <sub>23</sub> NO <sub>2</sub> | (M+H) <sup>+</sup> |

## IR spectrum of TPE-PMI

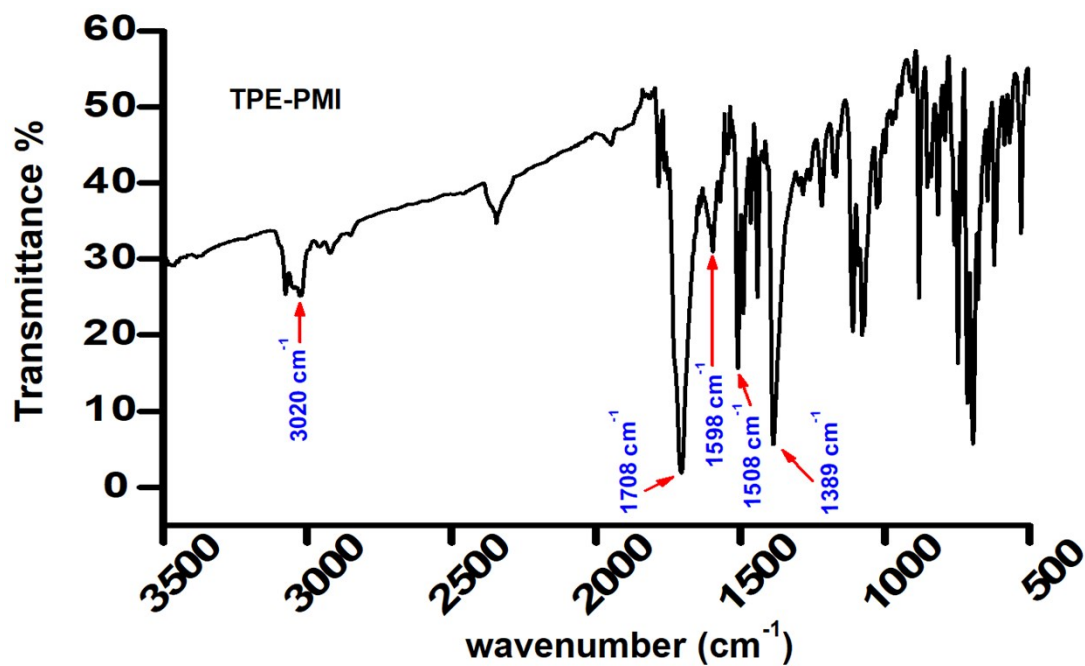

### $^1\text{H}$ NMR spectrum of TPE-NH<sub>2</sub>

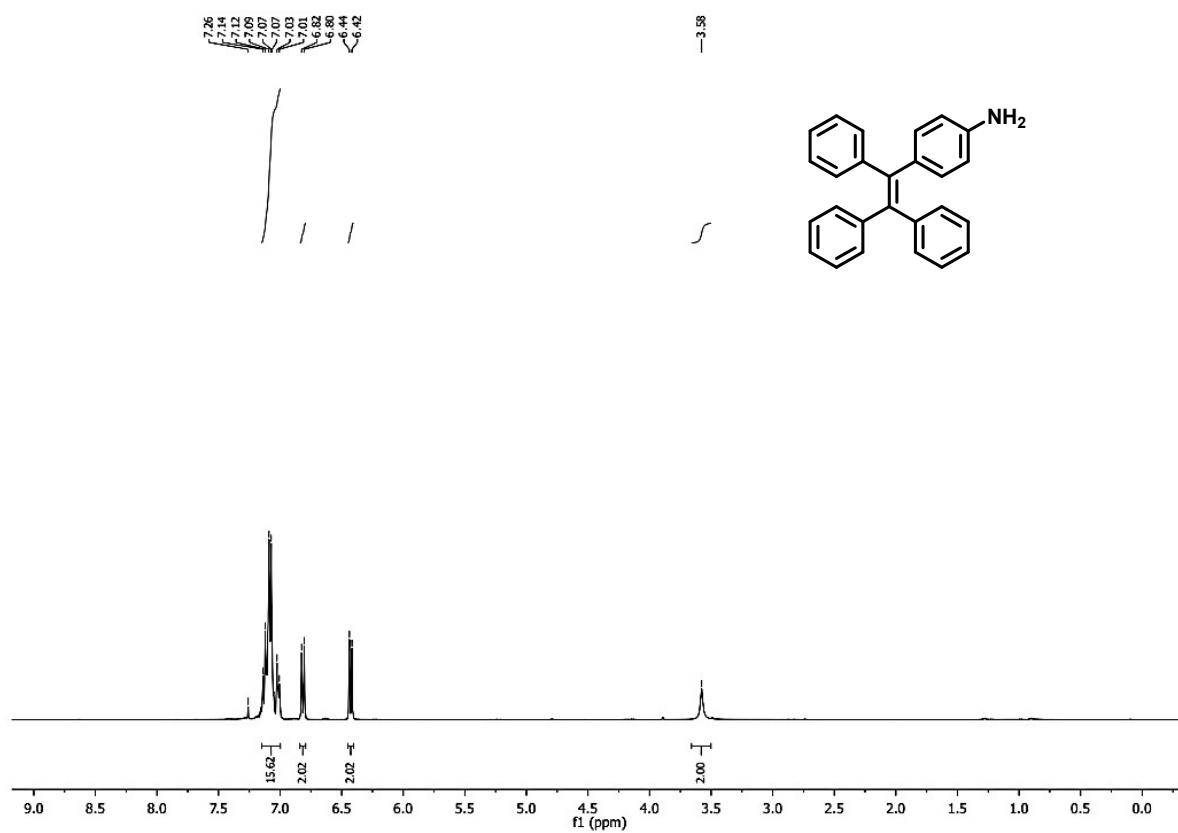

### $^{13}\text{C}$ NMR spectrum of TPE-NH<sub>2</sub>

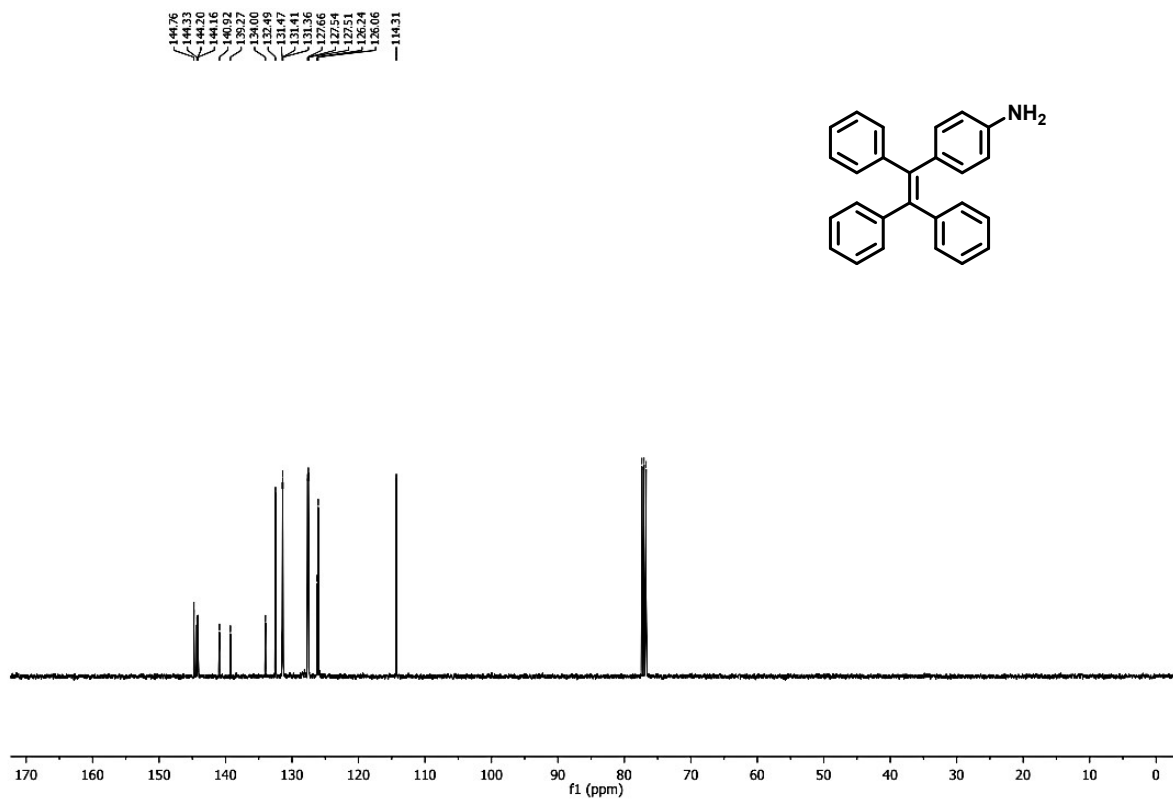

Supplement: d1ra03563k1.pdf [file d1ra03563k1.pdf]
